# Supplementary material for: Mass Balance and Compositional Analysis of Biomass Outputs from Cacao Fruits
Source: MDPI journal article supplement (doi:10.3390/molecules27123717), 2022-06-09
Supplement: s1 [file s1]

## SUPPLEMENTARY INFORMATION

### Mass balance and compositional analysis of biomass outputs from cacao fruits

Marisol Vergara-Mendoza, Genny R. Martínez, Cristian Blanco-Tirado and Marianny Y. Combariza

Escuela de Química, Universidad Industrial de Santander, Bucaramanga 680002, Colombia

\* marianny@uis.edu.co *To whom correspondence should be addressed.*

Supplementary information for Figure 2

**Table S1.** Traditional fresh cacao fruit biomass outputs: Cacao Husk (CH), Cacao Placenta (CP), and Cacao Beans (CBs) derived from the first stage of cacao fruit processing.

| Load/Date       | Biomass outputs        |                           |                         |             |
|-----------------|------------------------|---------------------------|-------------------------|-------------|
|                 | Fresh cacao husks (CH) | Fresh cacao placenta (CP) | Fresh cacao beans (CBs) | Losses      |
|                 | wt %                   | wt %                      | wt %                    | wt %        |
| February        | 70.13                  | 2.48                      | 22.68                   | 4.71        |
| March           | 67.84                  | 2.61                      | 23.64                   | 5.92        |
| April           | 67                     | 2.80                      | 25.24                   | 4.97        |
| May             | 66.1                   | 2.82                      | 27.33                   | 3.75        |
| June            | 63.71                  | 2.33                      | 24.28                   | 9.69        |
| July            | 70.55                  | 2.48                      | 26.72                   | 0.25        |
| August          | 67.09                  | 2.17                      | 24.21                   | 6.54        |
| September       | 69.09                  | 2.49                      | 22.12                   | 6.32        |
| October         | 67.87                  | 2.83                      | 23.89                   | 5.42        |
| November        | 66.33                  | 2.64                      | 25.69                   | 5.36        |
| December        | 60.1                   | 2.48                      | 24.17                   | 13.25       |
| January         | 67.66                  | 2.85                      | 24.57                   | 4.93        |
| Average + STDEV | 66.96 ± 2.83           | 2.58 ± 0.22               | 24.55 ± 1.51            | 5.92 ± 3.15 |

Supplementary information for Figure 3

**Table S2.** Potential cacao fruit biomass outputs, dried cacao husk (CH), dried cacao placenta (CP), dried cacao beans (CBs), and cacao mucilage exudate (CME) derived from the second stage of cacao fruit processing.

| Cacao load date | Biomass outputs  |                     |                  |                              |
|-----------------|------------------|---------------------|------------------|------------------------------|
|                 | Cacao husks (CH) | Cacao placenta (CP) | Cacao beans (CB) | Cacao mucilage exudate (CME) |
|                 | Dried wt %       | Dried wt %          | Dried wt %       | wt %                         |
| February        | 10.96            | 0.55                | 9.37             | 3.97                         |
| March           | 10.25            | 0.57                | 8.67             | 4.00                         |
| April           | 8.66             | 0.62                | 8.68             | 4.82                         |
| May             | 8.79             | 0.62                | 8.94             | 5.38                         |
| June            | 8.69             | 0.51                | 8.87             | 4.41                         |
| July            | 8.67             | 0.54                | 8.23             | 3.01                         |
| August          | 8.20             | 0.48                | 10.12            | 3.87                         |
| September       | 8.57             | 0.55                | 8.87             | 3.52                         |
| October         | 7.87             | 0.62                | 8.67             | 3.87                         |
| November        | 8.94             | 0.58                | 8.77             | 4.31                         |
| December        | 9.36             | 0.54                | 9.12             | 2.97                         |
| January         | 8.03             | 0.63                | 8.09             | 5.48                         |
| Average + STDEV | 8.92 ± 0.90      | 0.57 ± 0.05         | 8.87 ± 0.52      | 4.13 ± 0.80                  |

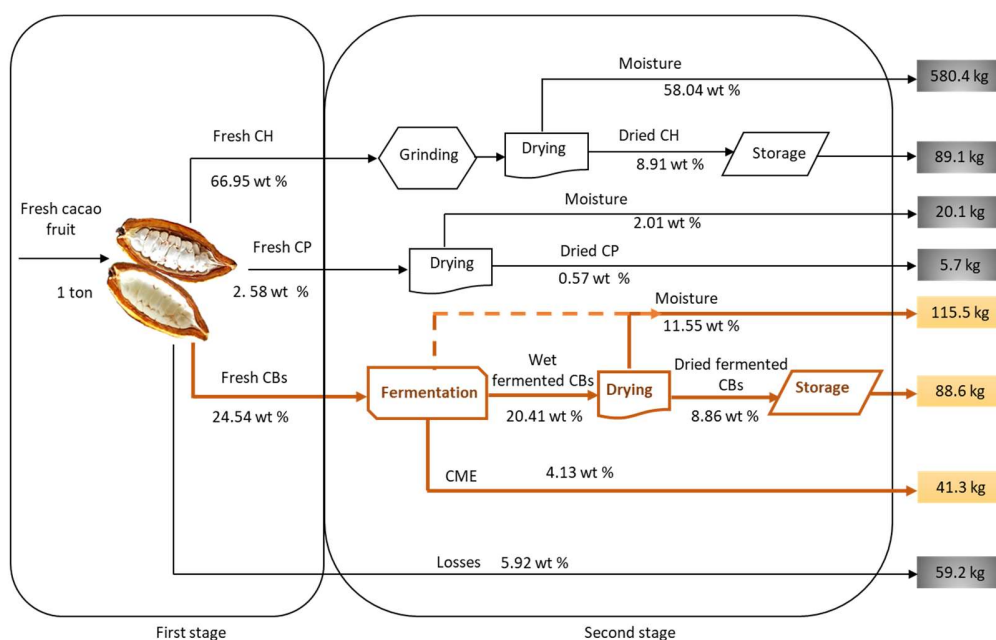

**Figure S1.** Supplementary Information with mass balance for the first and second stages of cacao fruit processing with averaged wt % data for all biomass outputs.

Supplementary information for Figure 5

**Table S3.** Composition analysis by load for fresh CH.

| Cacao<br>load date | Moisture        | Total<br>solids | Crude<br>Fat   | Crude<br>Fiber  | Crude<br>protein | Ash             | Total<br>nitrogen | Lignin          | Cellulose       | Hemicellu       | Calorific<br>value<br>(MJ kg <sup>-1</sup> ) |
|--------------------|-----------------|-----------------|----------------|-----------------|------------------|-----------------|-------------------|-----------------|-----------------|-----------------|----------------------------------------------|
|                    | wt %            |                 |                |                 |                  |                 |                   |                 |                 |                 |                                              |
| February           | 85.12           | 14.88           | 0.28           | 32.48           | 3.95             | 8.43            | 0.63              | 28.89           | 26.20           | 21.69           | 1.41                                         |
| March              | 84.19           | 15.81           | 0.26           | 32.75           | 5.85             | 8.78            | 0.93              | 29.97           | 25.51           | 21.93           | 1.39                                         |
| April              | 86.05           | 13.95           | 0.28           | 31.88           | 4.73             | 9.61            | 0.86              | 27.80           | 26.89           | 21.45           | 1.42                                         |
| May                | 83.49           | 16.51           | 0.30           | 32.21           | 5.53             | 12.73           | 0.88              | 25.15           | 22.97           | 23.82           | 1.36                                         |
| June               | 80.18           | 19.82           | 0.22           | 34.48           | 5.36             | 10.69           | 0.86              | 25.14           | 21.84           | 20.87           | 1.49                                         |
| July               | 86.57           | 13.43           | 0.37           | 29.94           | 4.25             | 11.43           | 0.68              | 39.03           | 24.28           | 21.10           | 1.23                                         |
| August             | 82.34           | 17.66           | 0.23           | 29.54           | 6.54             | 9.91            | 0.84              | 35.04           | 23.91           | 19.75           | 1.74                                         |
| September          | 87.36           | 12.64           | 0.23           | 31.27           | 5.72             | 14.01           | 0.91              | 33.68           | 21.88           | 18.72           | 1.19                                         |
| October            | 85.97           | 14.03           | 0.28           | 29.69           | 5.1              | 9.69            | 0.82              | 38.68           | 26.61           | 19.25           | 1.40                                         |
| November           | 84.46           | 15.55           | 0.35           | 28.14           | 6.04             | 9.80            | 0.97              | 38.41           | 27.73           | 18.22           | 1.62                                         |
| December           | 85.4            | 14.6            | 0.49           | 27.49           | 6.06             | 11.45           | 1.13              | 34.71           | 24.93           | 18.31           | 1.51                                         |
| January            | 84.3            | 15.7            | 0.19           | 31.31           | 6.18             | 11.28           | 0.99              | 36.21           | 34.90           | 14.45           | 1.49                                         |
| Average +<br>STDEV | 84.62 ±<br>1.97 | 15.38 ±<br>1.97 | 0.29 ±<br>0.08 | 30.93 ±<br>2.03 | 5.44 ±<br>0.80   | 10.65 ±<br>1.62 | 0.88 ±<br>0.13    | 32.73 ±<br>5.15 | 25.64 ±<br>3.49 | 19.66 ±<br>2.42 | 1,44 ± 0.15                                  |

**Table S4.** Composition of various agricultural lignocellulosic biomass outputs.

| Lignocellulosic material | Cellulose<br>(wt %) | Hemicellulose<br>(wt %) | Lignin<br>(wt %) | References |
|--------------------------|---------------------|-------------------------|------------------|------------|
| Nut shells               | 25 - 30             | 25 - 30                 | 30 - 40          | [42]       |
| Rice husk                | 37.1                | 29.4                    | 24.1             | [39]       |
| Sugarcane bagasse        | 32 - 44             | 27 - 32                 | 19 - 24          | [40]       |
| Cassava peels            | 37.9 ± 0.33         | 23.9 ± 0.49             | 7.5 ± 0.15       | [38]       |
| Corn cob                 | 38.27 ± 0.02        | 46.59 ± 2.5             | 7.16 ± 0.12      | [43]       |

|                       |              |              |              |           |
|-----------------------|--------------|--------------|--------------|-----------|
| Sweet sorghum bagasse | 45           | 27           | 21           | [41]      |
| Cocoa husk            | 25.64 ± 3.49 | 19.66 ± 2.42 | 32.73 ± 5.15 | This work |

**Table S5.** Proximate composition of sun-dried CH.

| Cacao load date | Moisture  | Ash         | Crude Fat   | Crude Protein | Crude Fiber  | NFE          | Calorific value     |
|-----------------|-----------|-------------|-------------|---------------|--------------|--------------|---------------------|
|                 | wt %      |             |             |               |              |              | MJ kg <sup>-1</sup> |
| February        | 10.26     | 10.84       | 1.00        | 6.15          | 35.56        | 36.19        | 13.41               |
| March           | 10.69     | 11.12       | 0.57        | 4.85          | 37.92        | 34.85        | 13.22               |
| April           | 11.06     | 9.80        | 0.67        | 5.81          | 33.73        | 38.93        | 13.55               |
| May             | 11.93     | 8.95        | 0.92        | 5.49          | 31.08        | 41.63        | 13.44               |
| June            | 10.47     | 8.34        | 2.33        | 5.67          | 30.16        | 43.03        | 13.99               |
| July            | 10.90     | 10.26       | 1.46        | 5.03          | 32.48        | 39.87        | 13.51               |
| August          | 10.12     | 9.48        | 2.58        | 5.62          | 29.72        | 42.48        | 14.00               |
| September       | 8.84      | 11.06       | 1.04        | 5.39          | 29.98        | 43.69        | 13.49               |
| October         | 8.75      | 10.35       | 2.51        | 5.20          | 27.03        | 46.16        | 14.62               |
| November        | 9.65      | 13.09       | 1.42        | 6.87          | 31.72        | 37.25        | 13.19               |
| December        | 9.11      | 11.35       | 1.57        | 6.61          | 33.87        | 37.49        | 13.65               |
| January         | 6.62      | 12.64       | 3.27        | 8.08          | 29.71        | 39.68        | 14.21               |
| Average + STDEV | 9.87±1.40 | 10.61 ±1.39 | 1.61 ± 0.86 | 5.90 ± 0.91   | 31.91 ± 2.98 | 40.10 ± 3.38 | 13.69± 0.43         |

**Table S6.** Physicochemical composition of CBs.

| Load/Date     | Moisture    | Ash        | Fat          | Protein      | Total Carbohydrates | Crude Fiber | Total Polyphenols      | Caloric value       |
|---------------|-------------|------------|--------------|--------------|---------------------|-------------|------------------------|---------------------|
|               | wt %        |            |              |              |                     |             | mg EAG g <sup>-1</sup> | MJ kg <sup>-1</sup> |
| February      | 4.74        | 2.93       | 52.77        | 12.67        | 24.67               | 2.22        | 49.97                  | 26.51               |
| March         | 4.53        | 2.53       | 54.46        | 11.34        | 25.36               | 2.14        | 54.54                  | 26.97               |
| April         | 4.17        | 2.64       | 54.16        | 11.45        | 24.73               | 2.64        | 61.68                  | 26.95               |
| May           | 3.97        | 2.51       | 55.37        | 12.37        | 22.66               | 2.61        | 36.21                  | 27.25               |
| June          | 4.48        | 2.41       | 55.15        | 11.98        | 22.63               | 3.28        | 46.80                  | 27.14               |
| July          | 3.76        | 2.48       | 55.05        | 12.47        | 23.35               | 2.89        | 42.33                  | 27.23               |
| August        | 3.82        | 2.24       | 54.39        | 11.63        | 22.64               | 5.28        | 42.78                  | 27.12               |
| September     | 3.79        | 2.40       | 53.90        | 11.85        | 26.34               | 2.98        | 42.52                  | 26.99               |
| October       | 3.70        | 2.41       | 52.68        | 12.25        | 26.93               | 3.34        | 44.63                  | 26.75               |
| November      | 4.14        | 2.57       | 55.03        | 12.37        | 22.39               | 3.68        | 52.12                  | 27.15               |
| December      | 2.94        | 2.53       | 55.36        | 12.31        | 22.5                | 4.36        | 57.58                  | 27.42               |
| January       | 3.49        | 2.45       | 54.62        | 12.52        | 23.9                | 3.02        | 36.57                  | 27.19               |
| Average+STDEV | 3.96 ± 0.50 | 2.5 ± 0.17 | 54.41 ± 0.92 | 12.10 ± 0.44 | 24.00 ± 2.24        | 3.20 ± 0.90 | 47.31 ± 8.03           | 27.06 ± 0.24        |

**Table S7.** Seasonal variations in the proximate analysis of CME from CCN51 cacao fruits.

| Load/Date     | Analysis results |             |             |                        |                   |                       |
|---------------|------------------|-------------|-------------|------------------------|-------------------|-----------------------|
|               | Moisture         | Ash         | Protein     | Total Carbohydrates    | Total Polyphenols | Caloric value         |
|               | wt %             |             |             | mg EAG g <sup>-1</sup> |                   | MJ kg g <sup>-1</sup> |
| February      | 71.59            | 0.53        | 0.43        | 27.45                  | 0.24              | 4.67                  |
| March         | 71.52            | 0.61        | 0.39        | 29.26                  | 0.29              | 4.96                  |
| April         | 80.78            | 0.46        | 0.36        | 22.67                  | 0.13              | 3.85                  |
| May           | 79.7             | 0.45        | 0.34        | 19.5                   | 0.43              | 3.32                  |
| June          | 80.34            | 0.43        | 0.32        | 19.21                  | 0.77              | 3.27                  |
| July          | 84.77            | 0.42        | 0.33        | 14.48                  | 0.4               | 2.48                  |
| August        | 88.63            | 0.48        | 0.25        | 10.91                  | 0.42              | 2.15                  |
| September     | 88.27            | 0.32        | 0.23        | 12.6                   | 0.4               | 2.15                  |
| October       | 86.33            | 0.33        | 0.24        | 13.09                  | 0.35              | 2.23                  |
| November      | 87.21            | 0.27        | 0.21        | 11.7                   | 0.31              | 1.99                  |
| December      | 84.32            | 0.57        | 0.17        | 14.94                  | 1.17              | 2.53                  |
| January       | 88.64            | 0.54        | 0.46        | 10.36                  | 1.7               | 1.81                  |
| Average±STDEV | 82.97 ± 6.09     | 0.45 ± 0.10 | 0.31 ± 0.09 | 17.18 ± 6.44           | 0.55 ± 0.45       | 2.95 ± 1.06           |

**Table S8.** Physicochemical analysis of CME.

| Cacao load date | Saccharose   | Glucose      | Fructose     | Total sugars  | Total soluble solids °Brix | Density     | pH          | Total solids | Sodium      | Aluminum    | Calcium     | Potassium        |
|-----------------|--------------|--------------|--------------|---------------|----------------------------|-------------|-------------|--------------|-------------|-------------|-------------|------------------|
| February        | 8.06         | 68.34        | 78.75        | 155.15        | 9.20                       | 1.04        | 3.72        | 15.75        | NR          | NR          | NR          | NR               |
| March           | 11.70        | 72.84        | 83.11        | 167.65        | 10.60                      | 1.04        | 3.76        | 16.59        | NR          | NR          | NR          | NR               |
| April           | 6.84         | 74.20        | 79.38        | 160.42        | 17.00                      | 1.07        | 3.74        | 14.92        | 0.85        | 4.68        | 42.56       | 2623.15          |
| May             | 9.27         | 73.52        | 81.24        | 164.04        | 12.00                      | 1.05        | 3.80        | 18.25        | NR          | NR          | NR          | NR               |
| June            | 8.59         | 58.94        | 84.43        | 151.96        | 13.00                      | 1.06        | 3.71        | 17.44        | NR          | NR          | NR          | NR               |
| July            | 8.93         | 66.23        | 82.84        | 158.00        | 7.00                       | 1.03        | 3.85        | 17.85        | NR          | NR          | NR          | NR               |
| August          | 8.10         | 73.56        | 82.17        | 163.83        | 6.00                       | 1.02        | 3.80        | 17.33        | NR          | NR          | NR          | NR               |
| September       | 7.27         | 80.89        | 81.50        | 169.66        | 15.00                      | 1.03        | 3.94        | 17.11        | 1.13        | 6.32        | 68.18       | 2074.51          |
| October         | 20.50        | 67.59        | 70.40        | 158.49        | 12.40                      | 1.06        | 3.81        | 17.56        | 1.29        | 7.31        | 60.90       | 2943.52          |
| November        | 33.73        | 54.30        | 59.30        | 147.33        | 12.00                      | 1.05        | 3.89        | 16.34        | 0.98        | 5.33        | 57.82       | 2059.45          |
| December        | 26.58        | 56.55        | 60.89        | 144.02        | 12.20                      | 1.05        | 3.85        | 16.95        | 1.13        | 6.32        | 59.36       | 2501.49          |
| January         | 19.43        | 58.80        | 62.48        | 140.71        | 12.10                      | 1.05        | 3.87        | 16.64        | 1.05        | 5.82        | 58.59       | 2280.47          |
| Average±STDEV   | 14.08 ± 8.89 | 67.15 ± 8.36 | 75.54 ± 9.54 | 156.77 ± 9.25 | 11.54 ± 3.07               | 1.05 ± 0.01 | 3.81 ± 0.07 | 16.89 ± 0.92 | 1.07 ± 0.15 | 5.96 ± 0.91 | 57.9 ± 8.40 | 2413.77 ± 343.68 |
